# Supplementary material for: Interface catalytic regulation via electron rearrangement and hydroxyl radicals triggered by oxygen vacancies and heavy metal ions
Source: Royal Society of Chemistry journal article supplement (doi:10.1039/d2sc06762e), 2023-01-01
Supplement: d2sc06762e1.pdf [file d2sc06762e1.pdf]

## Supplementary Information

# Interface catalytic regulation *via* the electron rearrangement and hydroxyl radicals triggered by oxygen vacancies and heavy metal ions

Xiang-Yu Xiao,<sup>a,b</sup> Zong-Yin Song,<sup>a,b</sup> Chong-Chong Zhang,<sup>c</sup> Yong-Huan Zhao,<sup>a,b</sup> Zhi-Wei Gao,<sup>a,b</sup> Shi-Hua Chen,<sup>a</sup> Pei-Hua Li,<sup>a</sup> Yu-Feng Sun,<sup>c</sup> Meng Yang,<sup>a,\*</sup> Xing-Jiu Huang<sup>a,b,\*</sup>

<sup>a</sup>Key Laboratory of Environmental Optics and Technology, And Environmental Materials and Pollution Control Laboratory, Institute of Solid State Physics, HFIPS, Chinese Academy of Sciences, Hefei 230031, P. R. China

<sup>b</sup>Department of Materials Science and Engineering, University of Science and Technology of China, Hefei 230026, P. R. China

<sup>c</sup>College of Mechanical and Automotive Engineering, Anhui Polytechnic University, Wuhu, Anhui 241000, PR China

\*Corresponding author

Email addresses: [myang@iim.ac.cn](mailto:myang@iim.ac.cn); [xingjiuhuang@iim.ac.cn](mailto:xingjiuhuang@iim.ac.cn)

## Table of contents

### 1. Experimental Section

- 1.1. Characterization.
- 1.2. Chemical reagents.
- 1.3. Fabrication of ZrO<sub>2</sub> nanomaterial modified GCE.
- 1.4. Electrochemical experiments.
- 1.5. Adsorption experiments.
- 1.6. XAFS data analysis.
- 1.7. *In-situ* EPR experiments.

### 2. Figures

- Fig. S1 The images of three samples.
- Fig. S2 The SEM images and the corresponding EDS of pristine ZrO<sub>2</sub>, V<sub>o</sub>-poor ZrO<sub>2</sub> and V<sub>o</sub>-rich ZrO<sub>2</sub>.
- Fig. S3 N<sub>2</sub> adsorption–desorption isotherms and pore diameter distribution of pristine ZrO<sub>2</sub>, V<sub>o</sub>-poor ZrO<sub>2</sub> and V<sub>o</sub>-rich ZrO<sub>2</sub>.
- Fig. S4 The Raman spectra of pristine ZrO<sub>2</sub>, V<sub>o</sub>-poor ZrO<sub>2</sub> and V<sub>o</sub>-rich ZrO<sub>2</sub>.
- Fig. S5 The k<sup>3</sup>(k) oscillations of V<sub>o</sub>-rich ZrO<sub>2</sub>.
- Fig. S6 The Zr K-edge EXAFS in R space and the fitting curves of pristine ZrO<sub>2</sub>, V<sub>o</sub>-poor ZrO<sub>2</sub>.
- Fig. S7 CV and EIS spectra of the pristine ZrO<sub>2</sub>, V<sub>o</sub>-poor ZrO<sub>2</sub>, and V<sub>o</sub>-rich ZrO<sub>2</sub>.
- Fig. S8 The optimized structures of pristine ZrO<sub>2</sub>, V<sub>o</sub>-poor ZrO<sub>2</sub>, and V<sub>o</sub>-rich ZrO<sub>2</sub>.
- Fig. S9 Comparison of TDOS among pristine ZrO<sub>2</sub>, V<sub>o</sub>-poor ZrO<sub>2</sub>, V<sub>o</sub>-rich ZrO<sub>2</sub> and ZrO<sub>2</sub> with no OVs.
- Fig. S10 Band gap diagrams of ZrO<sub>2</sub> with no OVs.
- Fig. S11 Comparison of high resolution XPS Pb 4f spectra.
- Fig. S12 Zeta potential in HAc–NaAc buffer solution at pH = 5.
- Fig. S13 The Pb L<sub>3</sub>-edge EXAFS in R space and the fitting curves of pristine ZrO<sub>2</sub>/Pb, V<sub>o</sub>-poor ZrO<sub>2</sub>/Pb.
- Fig. S14 Comparison of high resolution XPS Zr 3d spectra.
- Fig. S15 Comparison of high resolution XPS O 1s spectra.
- Fig. S16 The optimized configuration after adsorption of Pb(II) on pristine ZrO<sub>2</sub>, V<sub>o</sub>-poor ZrO<sub>2</sub>, and V<sub>o</sub>-rich ZrO<sub>2</sub>.
- Fig. S17 Charge density difference images of pristine ZrO<sub>2</sub>/Pb, V<sub>o</sub>-rich ZrO<sub>2</sub>/Pb and V<sub>o</sub>-poor ZrO<sub>2</sub>/Pb.
- Fig. S18 Comparison of DOS between pristine ZrO<sub>2</sub> and pristine ZrO<sub>2</sub>/Pb; V<sub>o</sub>-poor ZrO<sub>2</sub> and c V<sub>o</sub>-poor ZrO<sub>2</sub>/Pb.
- Fig. S19 Absolute value of Bader charge.
- Fig. S20 SWASV responses and linear equations of Pb(II) on V<sub>o</sub>-rich ZrO<sub>2</sub>/GCE,

pristine ZrO<sub>2</sub>/GCE, V<sub>o</sub>-poor ZrO<sub>2</sub>/GCE, and bare GCE.

Fig. S21 Scan rate study at bare GCE, pristine ZrO<sub>2</sub>, V<sub>o</sub>-poor ZrO<sub>2</sub> and V<sub>o</sub>-rich ZrO<sub>2</sub>.

Fig. S22 The catalytic cycle properties of V<sub>o</sub>-rich ZrO<sub>2</sub>/GCE.

### 3. Tables

Table S1. Zr K-edge EXAFS fitting results of V<sub>o</sub>-rich ZrO<sub>2</sub>, pristine ZrO<sub>2</sub> and V<sub>o</sub>-poor ZrO<sub>2</sub> samples by the ARTEMIS module of IFEFFIT.

Table S2. The calculated surface energies on {101} and {-111} with different OV's concentration.

Table S3. Defect-related features (ZrO<sub>x1</sub>, ZrO<sub>x2</sub>, and their sums) in peak intensity of Zr 3d and O 1s.

Table S4. Pb L<sub>3</sub>-edge EXAFS fitting results of V<sub>o</sub>-rich ZrO<sub>2</sub>/Pb, pristine ZrO<sub>2</sub>/Pb and V<sub>o</sub>-poor ZrO<sub>2</sub>/Pb samples by the ARTEMIS module of IFEFFIT.

Table S5. Bader charge of Zr, O, and Pb calculated by DFT.

### 4. References

## 1. Experimental Section

**1.1. Characterization.** The morphology of the ZrO<sub>2</sub> hollow sphere is examined by Focused Ion beam (FIB) (AURIGA, ZEISS Co) and high-resolution transmission electron microscopy (HRTEM; JEM-2010, JEOL Co). Thermochemical ESCALab 250 Xi with a monochromatic Al K $\alpha$  X-ray source was used to analyze the chemical composition of ZrO<sub>2</sub> under a 500  $\mu$ m beam spot with a fixed dialysis energy of 30 eV. Shimadzu UV-3600 instrument was used to measure the UV-Vis diffuse reflectance spectrum of the sample in the range of 200-1000 nm, and BaSO<sub>4</sub> was used as reference. Infrared spectra were recorded by FT-IR spectrometer in the range of 4000~600 cm<sup>-1</sup> (MagnaIR 750, Nicolet Instrument, USA). EPR tests were implemented with Bruker EMX plus 10/12 (equipped with Oxford ESR910 Liquid Helium cryostat). Electrochemical testing using a computer-controlled CHI 660D electrochemical workstation (Shanghai Chenhua Instrument Co).

**1.2. Chemical reagents.** Zirconocene dichloride (99%) was purchased from Aladdin (Shanghai, China). Acetone (AR) and other required chemicals come from Sinopharm Chemical Reagent Co., Ltd. (China). 5,5-Dimethyl-1-oxaporphyrin-N-oxide (DMPO) and 2,2,6,6-Tetramethyl-4-piperidine (TEMP) were obtained from Macklin Biochemical Co. Ltd. HAc-NaAc buffer solutions with different pH were prepared at different ratios of 0.1 M NaAc and 0.1 M HAc. Adjusting the different volume ratios of 0.1 M KH<sub>2</sub>PO<sub>4</sub> and Na<sub>2</sub>HPO<sub>4</sub> to different pH phosphate buffer solutions (PBS). Similarly, 0.1 M NH<sub>3</sub>·H<sub>2</sub>O-

NH<sub>4</sub>Cl solution of different pH is composed of 0.1 M NH<sub>4</sub>Cl and NH<sub>3</sub>•H<sub>2</sub>O. The pH of all buffer solutions was further adjusted by 0.1 M NaOH and 0.1 M HCl.

**1.3. Fabrication of ZrO<sub>2</sub> nanomaterial modified GCE.** First, the surface of the bare GCE electrode was sequentially treated with 0.3 and 0.1 μm alumina powder and the electrode was sonicated in dilute HNO<sub>3</sub> solution, ethanol and ultrapure water successively for 2 minutes to obtain a clean surface. After homogeneously dispersed 1 mg of our sample in 5 mL of deionized water, transfer 7 μL of the suspension onto the electrode, dried it with N<sub>2</sub> and waited for overnight to use.

**1.4. Electrochemical experiments.** Square wave anode stripping voltammetry (SWASV) was selected as the method of electrochemical experiments, and Pb(II) was detected under the optimized conditions. The deposition voltage of -1.3 V was adopted and kept running 150 s to catalytically reduce Pb(II). Then, the SWASV curve was obtained by operating potential from -1 V and 0.6 V to oxidize the deposited Pb(0). The desorption potential was set at 1.0 V for 120 s to desorb and completely remove the residual metal. The test frequency of electrochemical impedance spectroscopy (EIS) is between 1 and 10<sup>5</sup> Hz.

**1.5. Adsorption experiments.** Typically, HAc-NaAc (pH 5.0) buffer solution was mixed with 1 mM Pb(II) in a volume ratio of 9:1 to form a 10 mL solution, and then 10 mg of ZrO<sub>2</sub> powder was added. The preparation method of the

other group of solutions was similar. Adding 1 mL of Hg(II), Cu(II) and Cd(II) while keeping the total volume of 10 mL. Next, the mixtures were vibrated at room temperature for 24 h, then washed twice with ultrapure water, finally freeze-dried for 12 h to obtain powder for XPS measurement.

**1.6. XAFS data analysis.** The Zr K-edge and Pb L<sub>3</sub>-edge XAFS spectra were collected in transmission mode and Lytel-fluorescence mode, respectively, at the BL11B beamline of Shanghai Synchrotron Radiation Facility (SSRF). Athena software was used to subtract the background signal of the pre-edge and post-edge and to normalize spectra intensity. IFEFFIT software was employed to calibrate the energy scale and to correct the background.

**1.7. *In-situ* EPR experiments.** In the process of in-situ EPR experiments, the electrochemical workstation is placed adjacent to the EPR apparatus. The parameters and reagents used in SWASV tests of in-situ EPR experiments are totally consistent with that in normal electrochemical experiments except 100  $\mu$ L of spin-trapping agent is additional needed to drop in the buffer solution. The sampling process occurs during the last 10 seconds of electrodeposition, where 50  $\mu$ L of sample is taken by pipette from the buffer solution with thoroughly stirring. After absorbing the same amount of samples into the capillary glass tubes, the EPR experiments are carried out immediately.

## 2. Figures

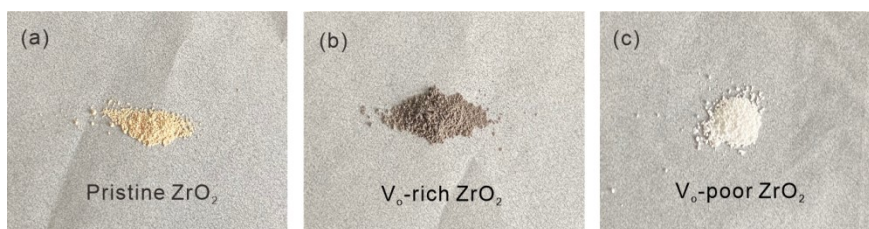

**Fig. S1** The synthesized three samples of (a) pristine  $ZrO_2$ , (b)  $V_o$ -poor  $ZrO_2$  and (c)  $V_o$ -rich  $ZrO_2$ .

The color of pristine  $ZrO_2$ ,  $V_o$ -rich  $ZrO_2$  and  $V_o$ -poor  $ZrO_2$  are faint yellow, dark brown, and white, respectively.

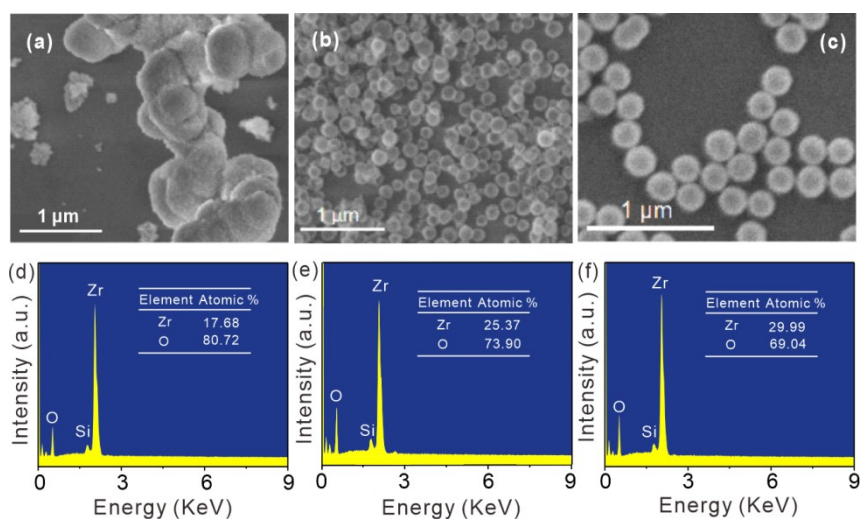

**Fig. S2** The SEM images and the corresponding EDS of (a,d)  $V_o$ -poor  $ZrO_2$ , (b,e) pristine  $ZrO_2$  and (c,f)  $V_o$ -rich  $ZrO_2$ .

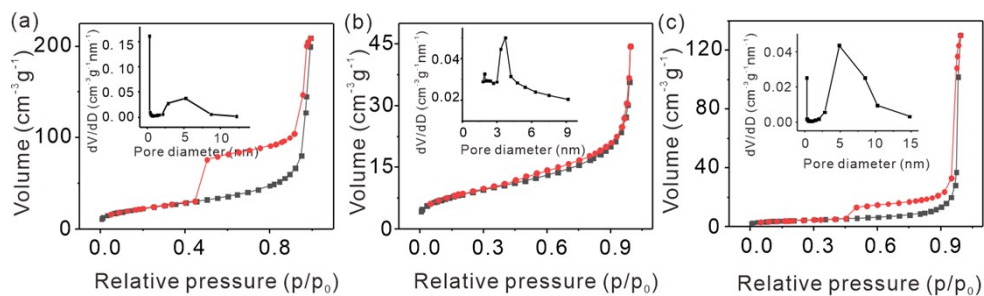

**Fig. S3**  $N_2$  adsorption-desorption isotherms and pore diameter distribution (inset) of (a) pristine  $ZrO_2$ , (b)  $V_o$ -poor  $ZrO_2$  and (c)  $V_o$ -rich  $ZrO_2$ .

The surface areas of the pristine  $\text{ZrO}_2$ ,  $\text{V}_\text{o}$ -poor  $\text{ZrO}_2$ , and  $\text{V}_\text{o}$ -rich  $\text{ZrO}_2$  were  $30 \text{ m}^2/\text{g}$ ,  $14 \text{ m}^2/\text{g}$  and  $82 \text{ m}^2/\text{g}$ , respectively, suggesting that the process of calcination cause obvious effect on the morphological structures of them. And the insertion diagrams in Fig. S3 exhibited their distribution of pore diameters were mainly between 3-10 nm.

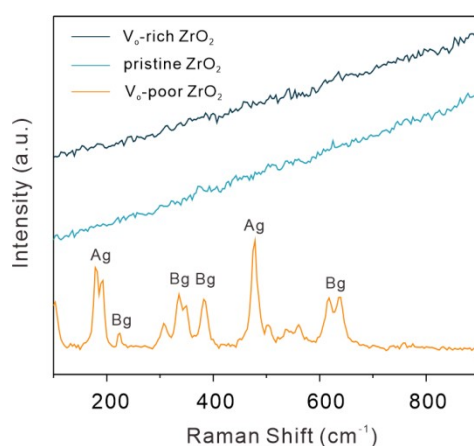

**Fig. S4** The Raman spectra of pristine  $\text{ZrO}_2$ ,  $\text{V}_\text{o}$ -poor  $\text{ZrO}_2$  and  $\text{V}_\text{o}$ -rich  $\text{ZrO}_2$ .

$\text{V}_\text{o}$ -poor  $\text{ZrO}_2$  showed obvious peaks of Ag at 178, 191 and  $476 \text{ cm}^{-1}$ , Bg at 222, 333, 382 and  $615 \text{ cm}^{-1}$ , which were assigned to the monoclinic  $\text{ZrO}_2$ <sup>1</sup>. However, for pristine  $\text{ZrO}_2$  and  $\text{V}_\text{o}$ -rich  $\text{ZrO}_2$  (tetragonal phase), the fluorescence signals were too high to detect Raman signals due to the crystalline transition, which provided evidence that the microstructures were very different with copious oxygen vacancies in  $\text{ZrO}_2$ .



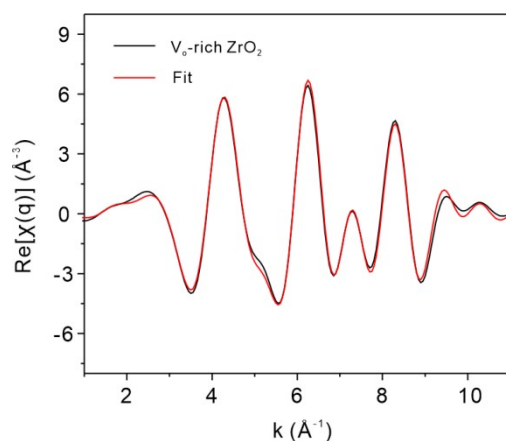

**Fig. S5** The  $k^3(k)$  oscillations of  $V_o$ -rich  $ZrO_2$  corresponding to Fig. 2b.

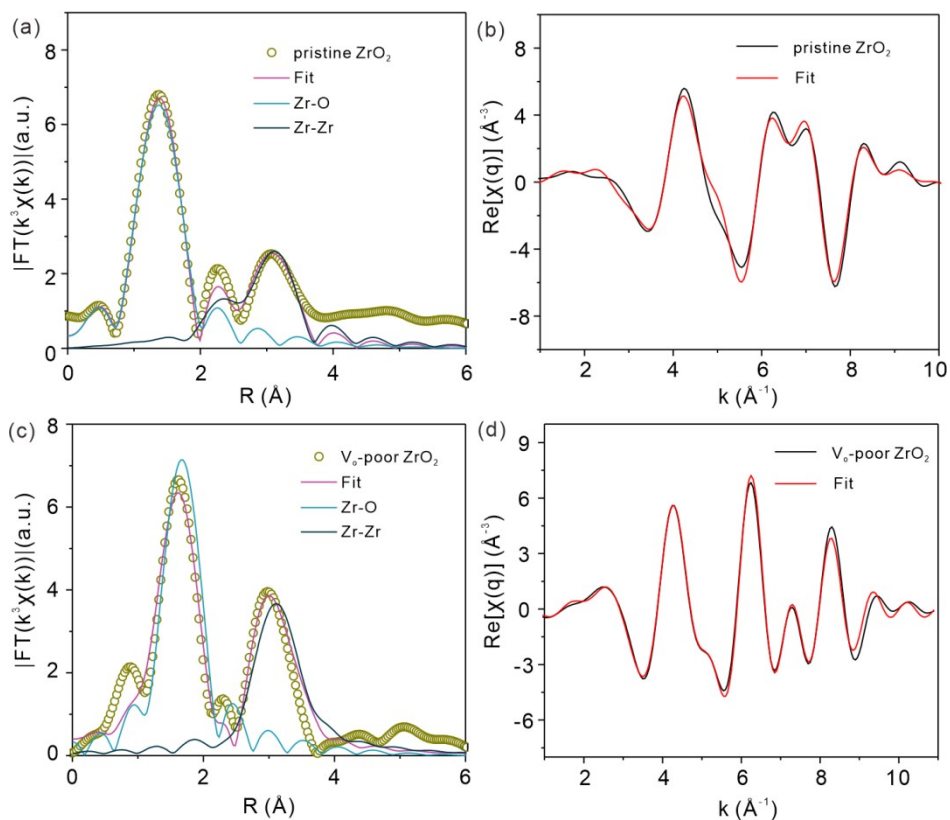

**Fig. S6** The Zr K-edge EXAFS in R space ( $k^3$ -weighted) and the fitting curves of (a) pristine  $ZrO_2$ ; (c)  $V_o$ -poor  $ZrO_2$  without correcting for scattering phase shift. (b, d) The corresponding  $k^3(k)$  oscillations of pristine  $ZrO_2$ ;  $V_o$ -poor  $ZrO_2$ , respectively.

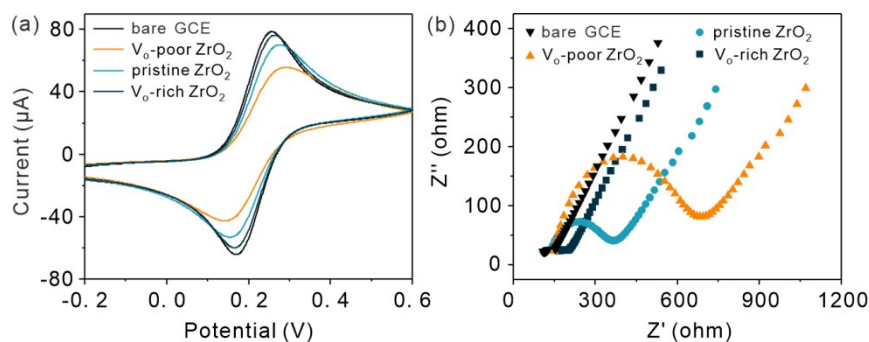

**Fig. S7** (a) CV and (b) EIS spectra of the pristine ZrO<sub>2</sub>, V<sub>o</sub>-poor ZrO<sub>2</sub>, and V<sub>o</sub>-rich ZrO<sub>2</sub>.

Obviously, the bare GCE showed the highest redox peak current due to its excellent conductivity, and V<sub>o</sub>-rich ZrO<sub>2</sub> ranked the second while V<sub>o</sub>-poor ZrO<sub>2</sub> had the lowest redox peak current which indicated its poor conductivity. The semicircles (Fig. S7b) represented their electron-transfer resistance ( $R_{et}$ ) and the corresponding values of pristine ZrO<sub>2</sub>, V<sub>o</sub>-poor ZrO<sub>2</sub>, and V<sub>o</sub>-rich ZrO<sub>2</sub> were 175 Ω, 225 Ω and 50 Ω, respectively<sup>2</sup>, demonstrating that the conductivity of ZrO<sub>2</sub> samples showed a positive correlation with the concentration of oxygen vacancies.

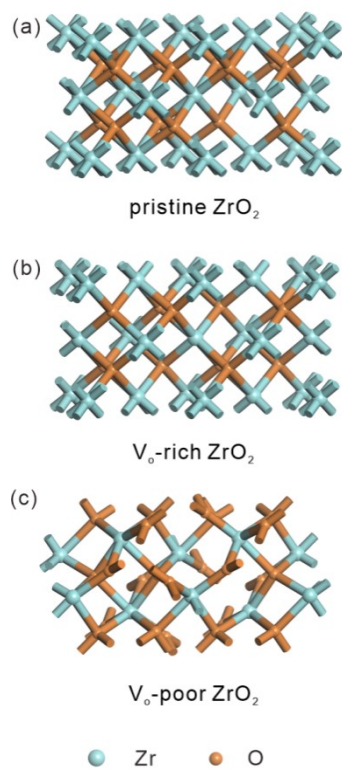

**Fig. S8** The optimized structures of (a) pristine  $\text{ZrO}_2$ ; (b)  $\text{V}_o$ -rich  $\text{ZrO}_2$  and (c)  $\text{V}_o$ -poor  $\text{ZrO}_2$ .

In optimized structures, tetragonal was used for pristine and  $\text{V}_o$ -rich  $\text{ZrO}_2$ , and monoclinic was used for  $\text{V}_o$ -poor  $\text{ZrO}_2$ . And the corresponding concentration of the oxygen vacancies in  $\text{V}_o$ -rich  $\text{ZrO}_2$ , pristine  $\text{ZrO}_2$ , and  $\text{V}_o$ -poor  $\text{ZrO}_2$  is 25%, 12.5% and 6.25%, respectively.

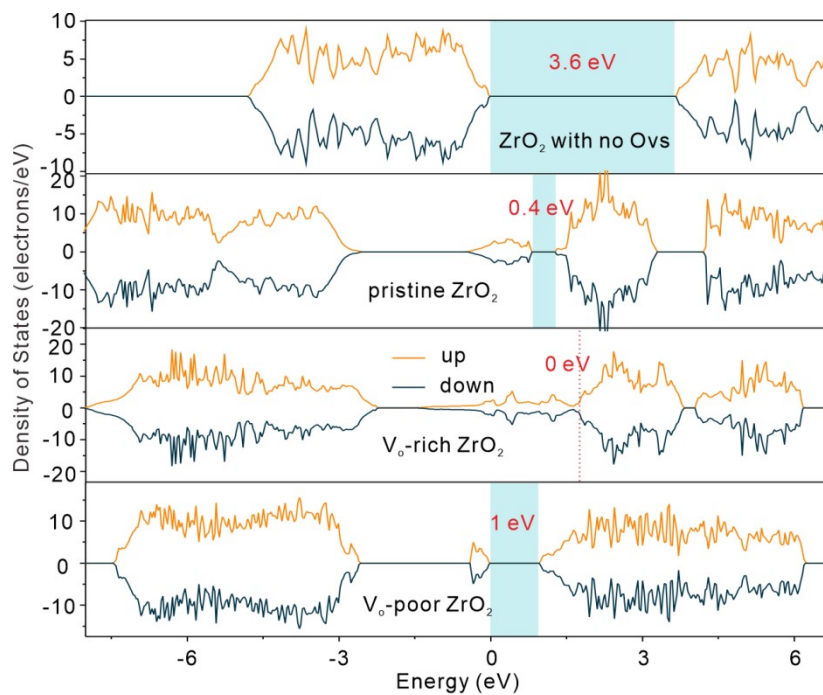

**Fig. S9** Comparison of TDOS among pristine  $\text{ZrO}_2$ ,  $\text{V}_o$ -rich  $\text{ZrO}_2$ ,  $\text{V}_o$ -poor  $\text{ZrO}_2$  and  $\text{ZrO}_2$  with no OVs.

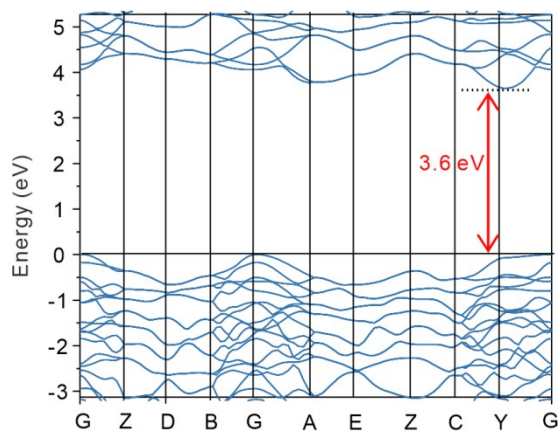

**Fig. S10** Band gap diagrams of  $\text{ZrO}_2$  with no OVs.

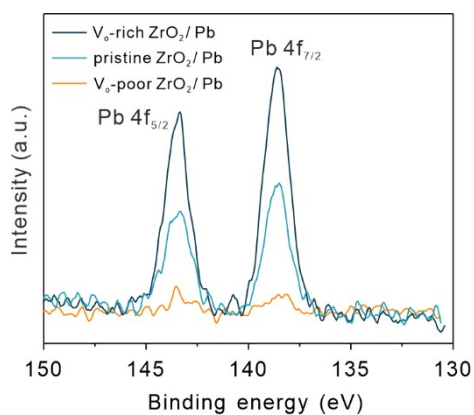

**Fig. S11** Comparison of high resolution Pb 4f XPS spectrum among pristine

ZrO<sub>2</sub>, V<sub>o</sub>-poor ZrO<sub>2</sub>, and V<sub>o</sub>-rich ZrO<sub>2</sub> after adsorption Pb(II).

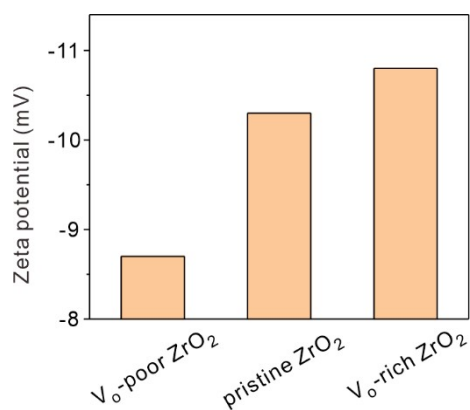

**Fig. S12** Zeta potential of three samples in HAc–NaAc buffer solution at pH = 5.

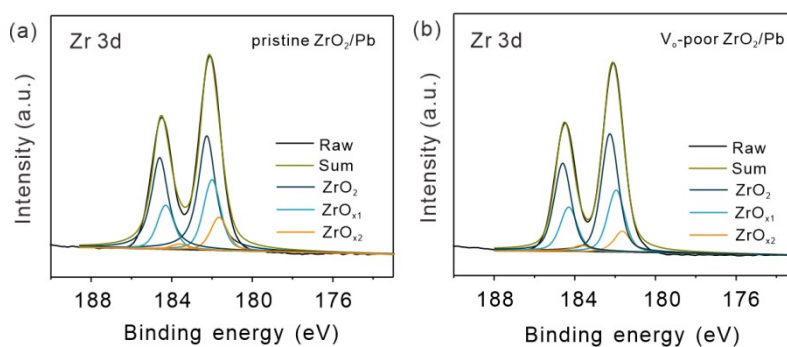

**Fig. S13** XPS Zr 3d spectra of (a) pristine ZrO<sub>2</sub>/Pb and (b) V<sub>o</sub>-poor ZrO<sub>2</sub>/Pb.

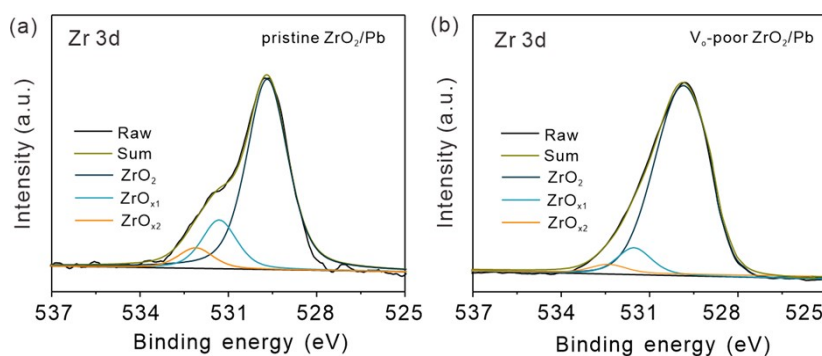

**Fig. S14** XPS O 1s spectra of (a) pristine ZrO<sub>2</sub>/Pb and (b) V<sub>o</sub>-poor ZrO<sub>2</sub>/Pb.

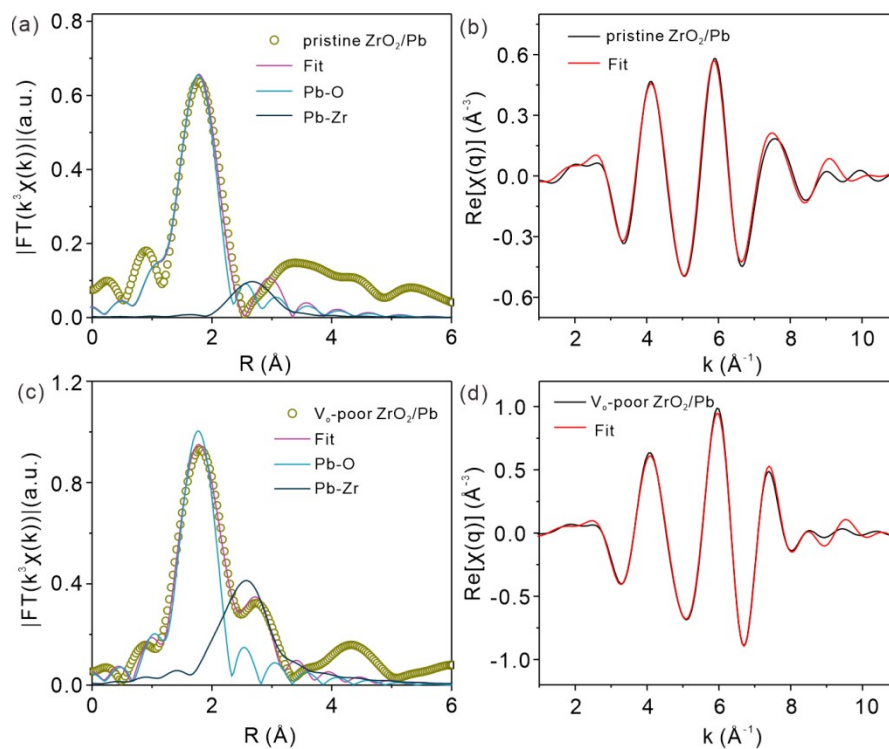

**Fig. S15** The Pb L<sub>3</sub>-edge EXAFS in R space (k<sup>3</sup>-weighted) and the fitting curves of (a) pristine ZrO<sub>2</sub>/Pb; (c) V<sub>o</sub>-poor ZrO<sub>2</sub>/Pb without correcting for scattering phase shift. (b, d) The corresponding k<sup>3</sup>(k) oscillations of pristine ZrO<sub>2</sub>/Pb; V<sub>o</sub>-poor ZrO<sub>2</sub>/Pb, respectively.

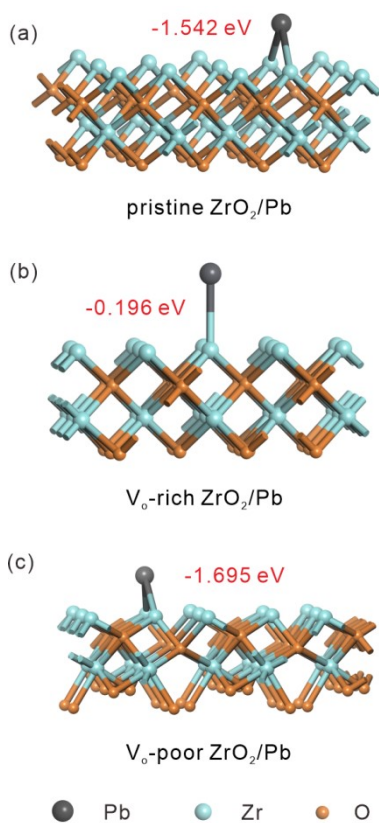

**Fig. S16** The optimized configuration after adsorption of Pb(II) on (a) pristine  $\text{ZrO}_2$ , (b)  $\text{V}_o$ -rich  $\text{ZrO}_2$  and (c)  $\text{V}_o$ -poor  $\text{ZrO}_2$  and the corresponding adsorption energies.

The crystal facet of 010 and the crystal phase of tetragona were used for the adsorption of Pb(II) on  $\text{V}_o$ -rich  $\text{ZrO}_2$  and pristine  $\text{ZrO}_2$ , where 100 facet, monoclinic phase for that of  $\text{V}_o$ -poor  $\text{ZrO}_2$ . During the process of optimization, assuming that the adsorption of Pb(II) occurs directly above Zr atoms, and the adsorption sites of Pb atoms will automatically shift slightly to obtain the present results.

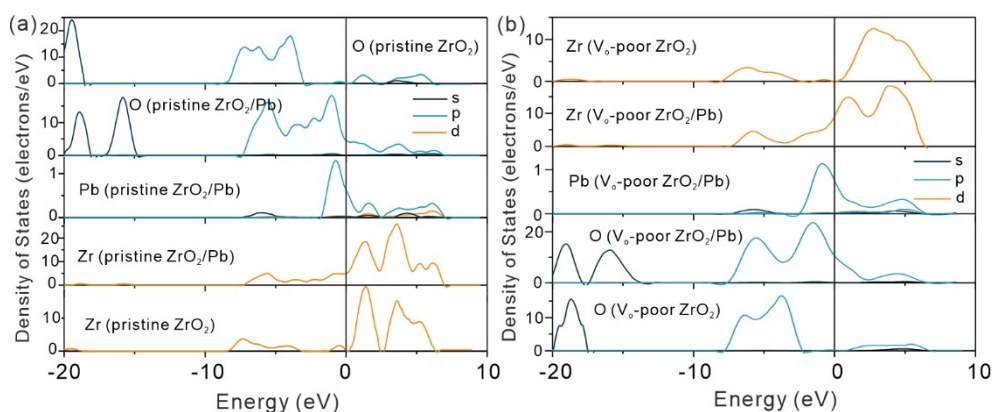

**Fig. S17** Comparison of DOS between (a) pristine  $\text{ZrO}_2$  and pristine  $\text{ZrO}_2/\text{Pb}$ ; (b)  $\text{V}_o$ -poor  $\text{ZrO}_2$  and (c)  $\text{V}_o$ -poor  $\text{ZrO}_2/\text{Pb}$ .



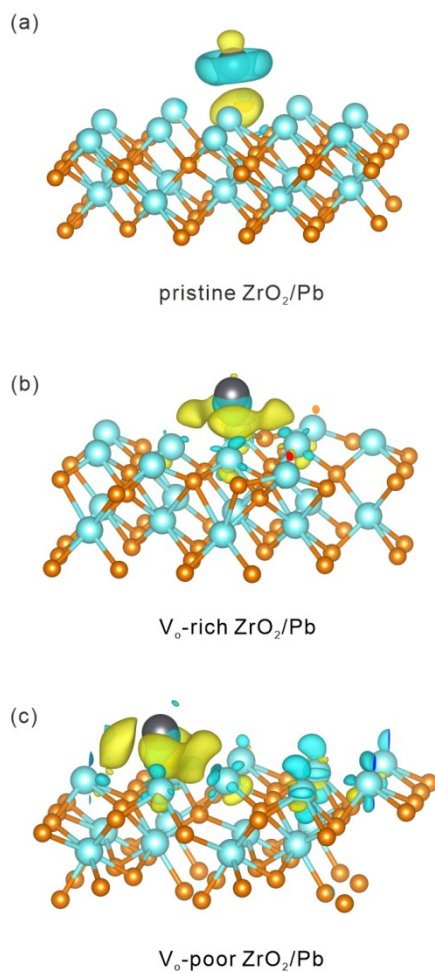

**Fig. S18** Charge density difference images of (a) pristine  $\text{ZrO}_2/\text{Pb}$ , (b)  $\text{V}_0$ -rich  $\text{ZrO}_2/\text{Pb}$  and (c)  $\text{V}_0$ -poor  $\text{ZrO}_2/\text{Pb}$ . The green areas symbolize electron depletion, and the yellow areas symbolize electron accumulation.



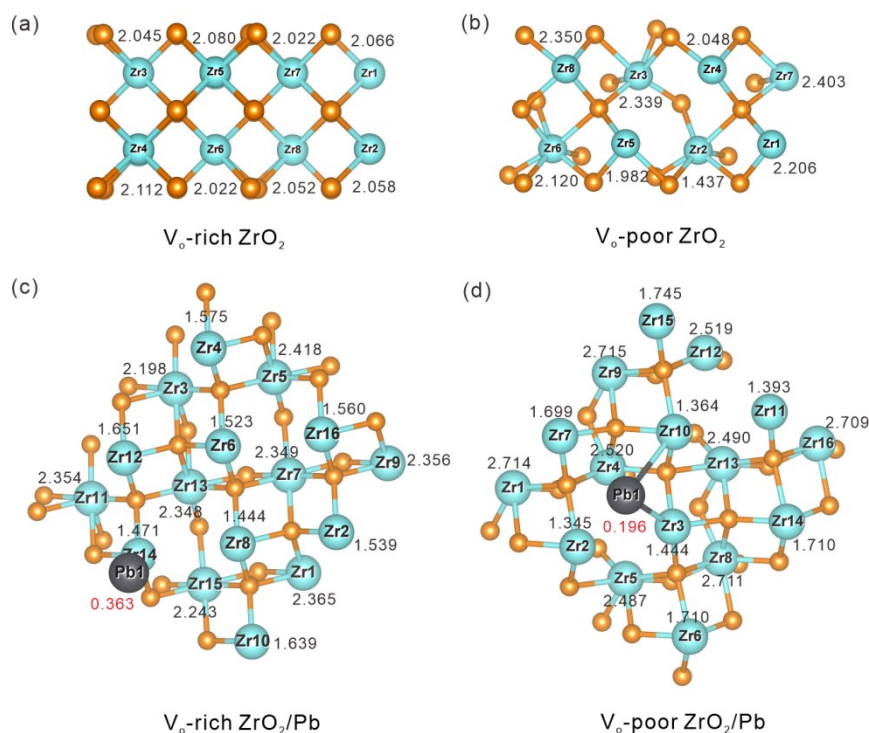

**Fig. S19** Absolute value of Bader charge of (a)  $V_0$ -rich  $ZrO_2$ , (b)  $V_0$ -poor  $ZrO_2$ , (c)  $V_0$ -rich  $ZrO_2/Pb$  and (d)  $V_0$ -poor  $ZrO_2/Pb$ .

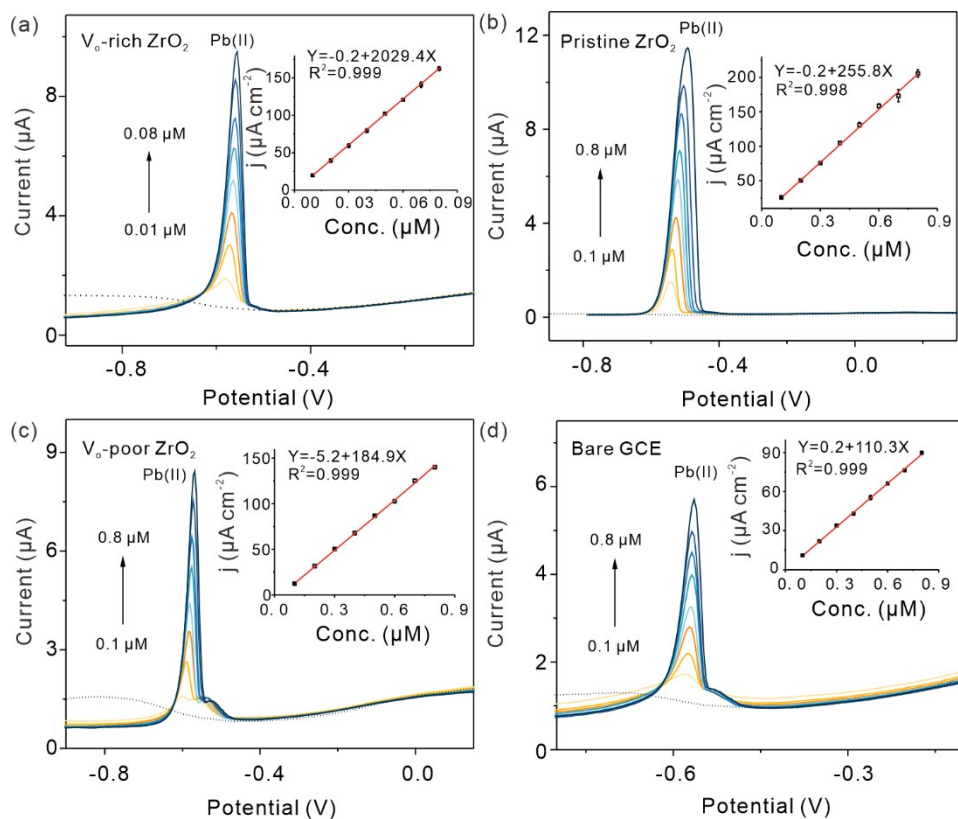

**Fig. S20** SWASV responses and linear equations (inset) of Pb(II) on (a)  $V_0$ -rich  $ZrO_2/GCE$ , (b) pristine  $ZrO_2/GCE$ , (c)  $V_0$ -poor  $ZrO_2/GCE$ , and (d) bare GCE.

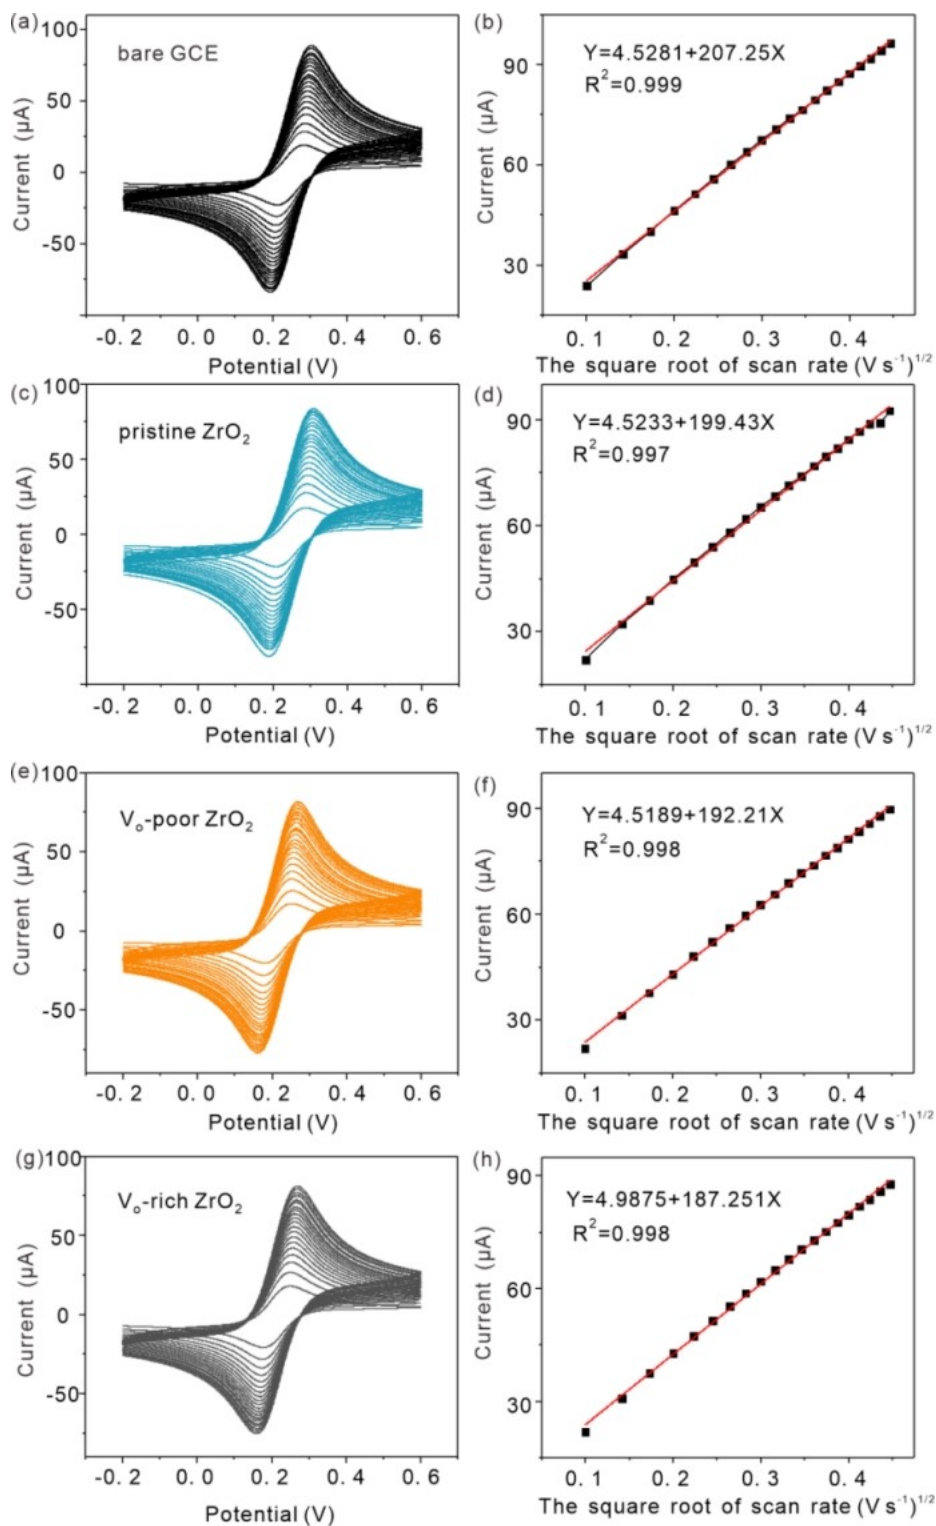

**Fig. S21** (a,c,e,g) Scan rate study (from 0.01 to 0.2  $\text{V s}^{-1}$ ) at bare GCE, pristine  $\text{ZrO}_2$ ,  $\text{V}_o$ -poor  $\text{ZrO}_2$  and  $\text{V}_o$ -rich  $\text{ZrO}_2$ , in the solution of 5 mM  $\text{Fe}(\text{CN})_6^{3-/4-}$  containing 0.1 M KCl, respectively. (b,d,f,h) The corresponding plot of current versus the square root of the scan rate with a linear trend line.

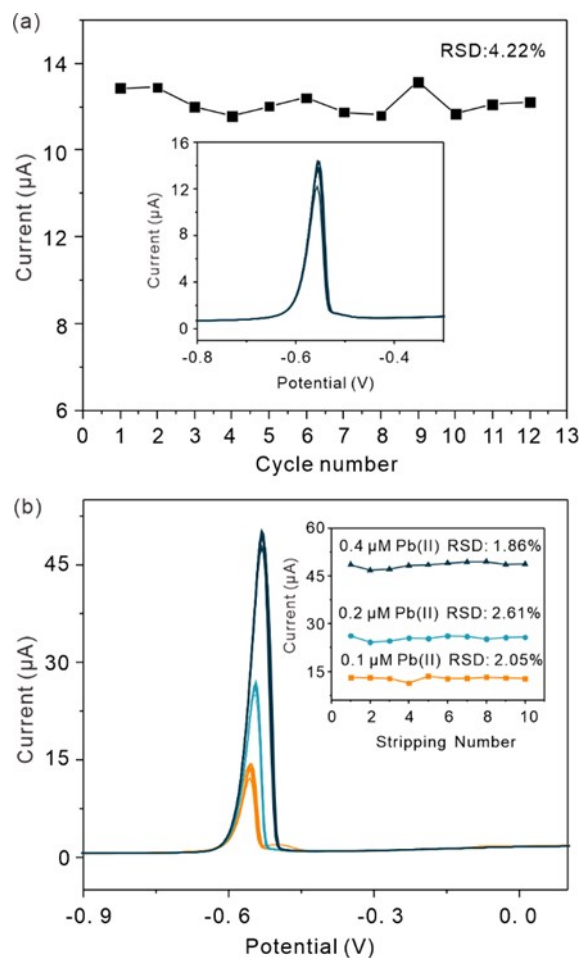

**Fig. S22.** (a) The stability of V<sub>o</sub>-rich ZrO<sub>2</sub>/GCE to Pb(II) at the same concentration (0.1 μM). (b) Reproducibility of V<sub>o</sub>-rich ZrO<sub>2</sub>/GCE at three different concentrations (0.1 μM, 0.2 μM, and 0.4 μM) in the detection of Pb(II).

To evaluate the prospect of practical application of V<sub>o</sub>-rich ZrO<sub>2</sub>, the corresponding experiments for verifying its catalytic cycle properties have also been carried out. Continuous 13 times SWASV tests of V<sub>o</sub>-rich ZrO<sub>2</sub> toward Pb(II) were implemented first with 0.1 μM Pb(II) fixed in HAc-NaAc buffer solution, as shown in Fig. S22a. It can be seen that the relative standard deviation (RSD) of the peak currents of Pb(II) in these thirteen cycles is 4.22% (< 5%), indicating the excellent stability of V<sub>o</sub>-rich ZrO<sub>2</sub> during catalytic reaction is obtained. Besides, the peak current signals of ten different GCEs to

be modified with V<sub>o</sub>-rich ZrO<sub>2</sub> at three different concentrations (0.1 μM, 0.2 μM, and 0.4 μM) are also examined (Fig. S22b). Similarly, the RSD of these three concentrations are less than 5%, and the RSD of 0.1 μM, 0.2 μM, and 0.4 μM are 2.05%, 2.61%, and 1.86%, respectively, showing excellent reproducibility. These results fully demonstrated that V<sub>o</sub>-rich ZrO<sub>2</sub> had excellent catalytic cycle properties, possessing great application prospect in catalysis field.

### 3. Table

**Table S1.** Zr K-edge EXAFS fitting results of V<sub>o</sub>-rich ZrO<sub>2</sub>, pristine ZrO<sub>2</sub> and V<sub>o</sub>-poor ZrO<sub>2</sub> samples by the ARTEMIS module of IFEFFIT.

| Sample                                | Path  | CN  | R(Å)      | $\sigma^2$<br>(10 <sup>-3</sup> Å <sup>2</sup> ) | $\Delta E_0$ (eV) | R-factor | S <sub>0</sub> <sup>2</sup> |
|---------------------------------------|-------|-----|-----------|--------------------------------------------------|-------------------|----------|-----------------------------|
| V <sub>o</sub> -rich ZrO <sub>2</sub> | Zr-O  | 3.1 | 2.20±0.01 | 2.0±0.5                                          | -1.4±0.5          | 0.006    |                             |
|                                       | Zr-Zr | 7.0 | 3.46±0.01 | 7.5±0.4                                          | -7.2±1.0          |          |                             |
| pristine ZrO <sub>2</sub>             | Zr-O  | 3.6 | 2.21±0.01 | 2.8±0.2                                          | -2.0±0.2          | 0.02     | 0.86                        |
|                                       | Zr-Zr | 7.4 | 3.46±0.02 | 4.6±0.3                                          | -2.4±2.0          |          |                             |
| V <sub>o</sub> -poor ZrO <sub>2</sub> | Zr-O  | 3.9 | 2.22±0.01 | 1.9±0.2                                          | -4.8±0.7          | 0.008    |                             |
|                                       | Zr-Zr | 7.6 | 3.47±0.02 | 6.8±0.5                                          | -6.4±0.6          |          |                             |

**Table S2.** The calculated surface energies on {101} and {-111} with different OV<sub>s</sub> concentration.

| Sample     | Surface Energies (J/m <sup>2</sup> ) |
|------------|--------------------------------------|
| {101}-1OV  | 2.70                                 |
| {101}-2OV  | 3.08                                 |
| {101}-3OV  | 3.49                                 |
| {-111}-1OV | 1.92                                 |
| {-111}-2OV | 2.60                                 |
| {-111}-3OV | 3.16                                 |

**Table S3.** Defect-related features (ZrO<sub>x1</sub>, ZrO<sub>x2</sub>, and their sums) of Zr 3d and O 1s.

|                                           | O 1s              |                   |                                       | Zr 3d             |                   |                                       |
|-------------------------------------------|-------------------|-------------------|---------------------------------------|-------------------|-------------------|---------------------------------------|
|                                           | ZrO <sub>x1</sub> | ZrO <sub>x2</sub> | ZrO <sub>x1</sub> + ZrO <sub>x2</sub> | ZrO <sub>x1</sub> | ZrO <sub>x2</sub> | ZrO <sub>x1</sub> + ZrO <sub>x2</sub> |
| Pristine ZrO <sub>2</sub>                 | 21.17             | 15.42             | 36.59                                 | 38.86             | 3.87              | 42.73                                 |
| pristine ZrO <sub>2</sub> /Pb             | 16.58             | 6.99              | 23.57                                 | 27.66             | 9.78              | 37.44                                 |
| V <sub>o</sub> -poor ZrO <sub>2</sub>     | 11.95             | 1.50              | 13.45                                 | 35.70             | 3.27              | 38.97                                 |
| V <sub>o</sub> -poor ZrO <sub>2</sub> /Pb | 9.70              | 1.35              | 11.05                                 | 15.21             | 9.85              | 25.06                                 |
| V <sub>o</sub> -rich ZrO <sub>2</sub>     | 21.98             | 20.00             | 41.98                                 | 43.09             | 4.30              | 47.39                                 |
| V <sub>o</sub> -rich ZrO <sub>2</sub> /Pb | 14.90             | 12.75             | 27.65                                 | 31.70             | 7.74              | 39.44                                 |

**Table S4.** Pb L<sub>3</sub>-edge EXAFS fitting results of V<sub>o</sub>-rich ZrO<sub>2</sub>/Pb, pristine ZrO<sub>2</sub>/Pb and V<sub>o</sub>-poor ZrO<sub>2</sub>/Pb samples by the ARTEMIS module of IFEFFIT.

| Sample                                    | Path  | CN  | R(Å)      | $\sigma^2$<br>(10 <sup>-3</sup> Å <sup>2</sup> ) | $\Delta E_0$ (eV) | R-factor | S <sub>0</sub> <sup>2</sup> |
|-------------------------------------------|-------|-----|-----------|--------------------------------------------------|-------------------|----------|-----------------------------|
| V <sub>o</sub> -rich ZrO <sub>2</sub> /Pb | Pb-O  | 1.2 | 2.30±0.01 | 7.0±0.4                                          | -4.6±0.5          | 0.002    | 0.80                        |
|                                           | Pb-Zr | 1.0 | 3.04±0.02 | 5.8±0.4                                          | 12.5±1.0          |          |                             |
| pristine ZrO <sub>2</sub> /Pb             | Pb-O  | 1.3 | 2.28±0.01 | 8.4±0.2                                          | -4.4±0.2          | 0.009    |                             |
|                                           | Pb-Zr | 1.0 | 3.01±0.02 | 5.2±0.3                                          | 20.5±2.0          |          |                             |
| V <sub>o</sub> -poor ZrO <sub>2</sub> /Pb | Pb-O  | 1.5 | 2.29±0.01 | 7.0±0.2                                          | -2.6±0.7          | 0.006    |                             |
|                                           | Pb-Zr | 1.2 | 3.00±0.02 | 7.9±0.5                                          | 17.3±0.6          |          |                             |

**Table S5.** Bader charge of Zr, O, and Pb calculated by DFT.

| Configurations                            | Bader charge ( <i>e</i> ) |       |       |
|-------------------------------------------|---------------------------|-------|-------|
|                                           | Zr                        | O     | Pb    |
| V <sub>o</sub> -poor ZrO <sub>2</sub>     | -2.111                    | 1.126 | -     |
| V <sub>o</sub> -poor ZrO <sub>2</sub> /Pb | -2.080                    | 1.103 | 0.196 |
| V <sub>o</sub> -rich ZrO <sub>2</sub>     | -2.052                    | 1.368 | -     |
| V <sub>o</sub> -rich ZrO <sub>2</sub> /Pb | -1.396                    | 1.278 | 0.363 |

#### 4. Reference

1. L. Zhao, J. Zhao, T. Wu, M. Zhao, W. Yan, Y. Zhang, H. Li, Y. Wang, T. Xiao and Y. Zhao, *Nanomaterials*, 2019, **9**, 406.
2. Y. Y. Li, Z. Y. Song, X. Y. Xiao, L. K. Zhang, H. Q. Huang, W. Q. Liu and X. J. Huang, *J. Hazard Mater.*, 2022, **435**, 129009.
